# Supplementary material
Source: Springer Nature journal article supplement (https://www.springermedizin.de/resource/supplementary/12937_2011_428_MOESM1_ESM.pdf/25653082)

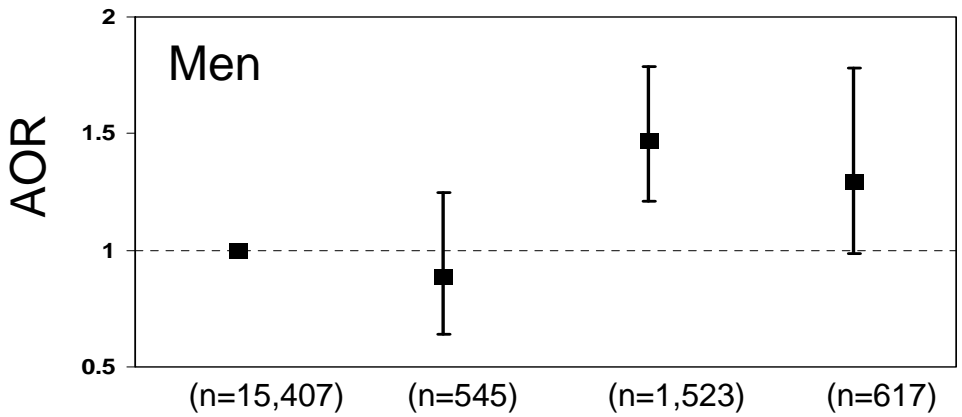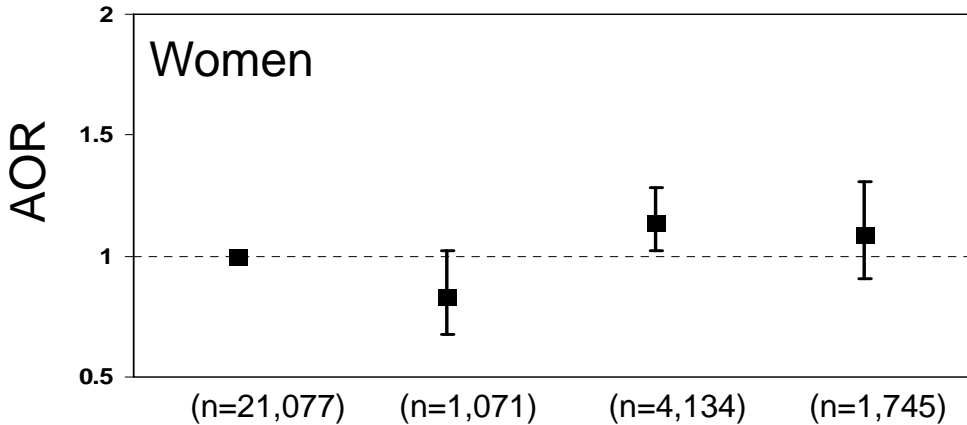

Ever diagnosed depression

no

no

yes

yes

EDS

no

yes

no

yes

Supplement: MOESM1 [file 25653082]
